# Supplementary material for: Airborne flux measurements of biogenic isoprene over California
Source: Copernicus journal article supplement (doi:10.5194/acp-14-10631-2014), 2014-10-10
Supplement: Supplementary file 1 [file acp-14-10631-2014-supplement.zip]

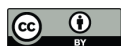

## *Supplement of*

# **Airborne flux measurements of biogenic isoprene over California**

**P. K. Misztal et al.**

*Correspondence to:* P. K. Misztal ([pkm@berkeley.edu](mailto:pkm@berkeley.edu))

- Supplement-Cover-Letter.pdf
- SI\_revised\_ACP-2014-84.pdf
- Supplementary\_video\_ACP-2014-84.mp4
